# Supplementary material for: Population Genomics and Structure of the Critically Endangered Mariana Crow (Corvus kubaryi)
Source: MDPI journal article supplement (doi:10.3390/genes10030187), 2019-03-01

SI Table 1. Location where each one of the Mariana crows sequenced for this study. Values per read per individual are included as well as observed homozygosity, expected homozygosity and  $F_{IS}$  values. Tab “SampleInformation” gives statistics calculated using all individuals. “Statistics\_84477245\_99404745” lists statistics calculated with individuals 84477245 and 99404745 excluded.

SI Table 2. Kinship estimates of all individual pairs. Rota individual 213145 shows notable kinship with the Guam birds. Tabs “MeanKinships\_AllIndividuals” and “MeanKinships\_84477245\_99404745” depict heat maps of mean kinship estimates with high kinship values in red and low values in white, while “KinshipCI\_AllIndividuals” and “KinshipCI\_84477245\_99404745” give their corresponding 95% confidence intervals. “MeanKinships\_AllIndividuals” and “KinshipCI\_AllIndividuals” includes all individuals, while “MeanKinships\_84477245\_99404745” and “KinshipCI\_84477245\_99404745” excludes individuals 84477245 and 99404745.

SI Figure 1. Principle Component Analysis of Rota subpopulations. The top row uses all samples (6,741 SNVs), while the bottom excludes individuals 84477245 and 99404745 (6,722 SNVs) due to a possible sample mix-up. Although there is weak evidence of structuring demonstrated by the 50% data ellipses, the 95% data ellipses are largely overlapping, indicating that larger sample sizes are needed to confidently resolve populations via PCA.

SI Figure 2. Dendrogram using 6,741 SNVs showing a clear separation between Mariana Crow samples from Guam ( $n = 5$ , black dots) and Rota ( $n = 78$ , red dots). Genetic distances are based on identity-by-state.

SI Figure 3. Principal Component Analysis (PCA) of Mariana Crows from Guam and Rota using 6,722 SNVs. Individuals 84477245 and 99404745 have been excluded due to a possible sample mix-up. The 95% data ellipses clearly distinguish the populations from the two islands. The two intermediate individuals along Eigenvector 1 could be individuals of mixed Rota/Guam ancestry, with one on Guam and the other on Rota.

SI Figure 4. (a) Structure analysis showing the mapped Mariana Crow subpopulations of Rota (defined populations 1–7) and Guam using  $K = 3$ . Individuals 84477245 and 99404745 have been excluded due to a possible sample mix-up. Population “Rota NP” includes Rota individuals of unknown provenance on the island. Each individual is represented by a vertical line partitioned into colored segments representing their proportional assignment to each of the three clusters. Orange and purple correspond to individuals from Rota, while green correspond to individuals from Guam. (b) The Discriminant Analysis of Principal Components (DAPC) shows a very similar pattern to the structure analysis. Individuals from Guam are differentiated (shown in green). In addition, most of the individuals from Northeast Rota form one group, while the southern portion of the island shows more mixing. (c) ADMIXTURE and Structure return nearly identical population assignments for  $K = 3$ . ADMIXTURE identified some possible additional population structure under the  $K = 5$  model. Figure drawn using DISTRUCT 1.1 (Rosenberg 2004).

SI Data. Mariana Crow (*Corvus kubaryi*) capture probe sequences in FASTA format.

| Individual | Mean Site Depth | Missing Genotypes (% Missing) | Observed Homozygosity | Expected Homozygosity | $F_{IS}$ |
|------------|-----------------|-------------------------------|-----------------------|-----------------------|----------|
| 279        | 15.80           | 10 (0.14%)                    | 4985                  | 4398.4                | 0.258    |
| 281        | 11.64           | 12 (0.17%)                    | 4988                  | 4397.5                | 0.260    |
| 668        | 8.12            | 105 (1.56%)                   | 4771                  | 4334.6                | 0.194    |
| 901        | 111.89          | 2 (0.02%)                     | 5131                  | 4404.0                | 0.319    |
| Guam-55#1  | 3.84            | 1729 (25.72%)                 | 3578                  | 3283.7                | 0.174    |
| 213142     | 25.45           | 1 (0.01%)                     | 4543                  | 4405.9                | 0.060    |
| 213143     | 23.21           | 0 (0.00%)                     | 4153                  | 4405.4                | -0.111   |
| 213144     | 36.47           | 1 (0.01%)                     | 4363                  | 4405.0                | -0.018   |
| 213145     | 16.48           | 3 (0.04%)                     | 853                   | 4403.5                | -1.559   |
| 213146     | 47.87           | 0 (0.00%)                     | 4394                  | 4405.9                | -0.005   |
| 213392     | 14.28           | 33 (0.49%)                    | 4510                  | 4382.8                | 0.056    |
| 213396     | 33.30           | 1 (0.01%)                     | 4392                  | 4405.2                | -0.006   |
| 215119     | 3.87            | 826 (12.28%)                  | 4306                  | 3875.7                | 0.216    |
| 84477217   | 19.08           | 1 (0.01%)                     | 4186                  | 4405.1                | -0.096   |
| 84477218   | 62.36           | 0 (0.00%)                     | 4580                  | 4405.9                | 0.076    |
| 84477219   | 25.29           | 0 (0.00%)                     | 4508                  | 4405.9                | 0.045    |
| 84477221   | 38.16           | 0 (0.00%)                     | 4431                  | 4405.9                | 0.011    |
| 84477222   | 12.22           | 12 (0.17%)                    | 4455                  | 4397.9                | 0.025    |
| 84477223   | 17.57           | 0 (0.00%)                     | 4327                  | 4405.9                | -0.035   |
| 84477227   | 26.96           | 0 (0.00%)                     | 4412                  | 4405.9                | 0.003    |
| 84477230   | 84.37           | 0 (0.00%)                     | 4159                  | 4405.9                | -0.108   |
| 84477231   | 53.83           | 0 (0.00%)                     | 4397                  | 4405.9                | -0.004   |
| 84477232   | 48.77           | 0 (0.00%)                     | 4838                  | 4405.9                | 0.190    |
| 84477233   | 14.40           | 9 (0.13%)                     | 4568                  | 4399.0                | 0.074    |
| 84477234   | 22.68           | 0 (0.00%)                     | 4138                  | 4405.9                | -0.118   |
| 84477235   | 19.00           | 3 (0.04%)                     | 4238                  | 4403.5                | -0.073   |
| 84477236   | 39.76           | 0 (0.00%)                     | 4590                  | 4405.9                | 0.081    |
| 84477238   | 16.65           | 1 (0.01%)                     | 4500                  | 4405.3                | 0.042    |
| 84477239   | 76.97           | 0 (0.00%)                     | 4538                  | 4405.9                | 0.058    |
| 84477240   | 11.98           | 9 (0.13%)                     | 4457                  | 4400.2                | 0.025    |
| 84477243   | 22.82           | 1 (0.01%)                     | 4601                  | 4405.3                | 0.086    |
| 84477246   | 27.18           | 0 (0.00%)                     | 4440                  | 4405.9                | 0.015    |
| 84477247   | 45.39           | 0 (0.00%)                     | 4425                  | 4405.9                | 0.008    |
| 84477251   | 7.67            | 132 (1.96%)                   | 5013                  | 4315.7                | 0.312    |
| 84477254   | 42.33           | 0 (0.00%)                     | 4381                  | 4405.9                | -0.011   |
| 84477255   | 16.42           | 1 (0.01%)                     | 5181                  | 4405.1                | 0.341    |
| 99403003   | 27.10           | 0 (0.00%)                     | 4503                  | 4405.9                | 0.043    |
| 99403004   | 24.74           | 0 (0.00%)                     | 4494                  | 4405.9                | 0.039    |
| 99403005   | 13.84           | 5 (0.07%)                     | 4027                  | 4402.3                | -0.165   |
| 99403006   | 22.72           | 0 (0.00%)                     | 4806                  | 4405.9                | 0.176    |
| 99403007   | 18.05           | 0 (0.00%)                     | 4837                  | 4405.9                | 0.189    |
| 99403008   | 13.48           | 28 (0.41%)                    | 3916                  | 4387.4                | -0.208   |
| 99403009   | 46.90           | 0 (0.00%)                     | 4100                  | 4405.9                | -0.134   |
| 99403010   | 2.54            | 1140 (16.95%)                 | 4098                  | 3656.5                | 0.233    |
| 99403012   | 79.35           | 0 (0.00%)                     | 4240                  | 4405.9                | -0.073   |
| 99403013   | 53.92           | 0 (0.00%)                     | 4663                  | 4405.9                | 0.113    |
| 99403014   | 8.37            | 100 (1.48%)                   | 4470                  | 4340.1                | 0.058    |
| 99403016   | 21.26           | 0 (0.00%)                     | 4820                  | 4405.9                | 0.182    |
| 99403017   | 7.68            | 86 (1.27%)                    | 4625                  | 4348.0                | 0.123    |
| 99403018   | 17.11           | 2 (0.02%)                     | 4415                  | 4404.4                | 0.005    |
| 99404732   | 49.85           | 0 (0.00%)                     | 4546                  | 4405.9                | 0.061    |
| 99404736   | 7.24            | 148 (2.20%)                   | 4349                  | 4306.5                | 0.019    |
| 99404738   | 3.81            | 681 (10.13%)                  | 4244                  | 3958.8                | 0.139    |
| 99404739   | 14.42           | 15 (0.22%)                    | 4693                  | 4395.9                | 0.131    |
| 99404740   | 8.85            | 10 (0.14%)                    | 4770                  | 4399.4                | 0.163    |
| 99404742   | 13.26           | 10 (0.14%)                    | 4711                  | 4400.0                | 0.137    |
| 99404743   | 19.80           | 0 (0.00%)                     | 4066                  | 4405.9                | -0.149   |
| 99404744   | 28.66           | 0 (0.00%)                     | 4065                  | 4405.9                | -0.150   |
| 99404746   | 27.65           | 0 (0.00%)                     | 4933                  | 4405.9                | 0.231    |
| 99404749   | 12.74           | 13 (0.19%)                    | 4333                  | 4397.6                | -0.028   |
| 99404750   | 9.89            | 54 (0.80%)                    | 4620                  | 4370.6                | 0.110    |
| 99404751   | 3.02            | 1061 (15.78%)                 | 4098                  | 3718.7                | 0.199    |
| 99404752   | 9.07            | 3 (0.04%)                     | 4161                  | 4403.5                | -0.106   |
| 99404753   | 4.61            | 463 (6.88%)                   | 4792                  | 4103.5                | 0.325    |
| 99404755   | 8.09            | 103 (1.53%)                   | 4372                  | 4340.6                | 0.014    |
| 99404756   | 36.02           | 0 (0.00%)                     | 4422                  | 4405.9                | 0.007    |
| 99404757   | 5.73            | 258 (3.83%)                   | 4616                  | 4234.8                | 0.174    |
| 99404758   | 8.88            | 58 (0.86%)                    | 4134                  | 4369.1                | -0.104   |
| 99404759   | 4.89            | 406 (6.03%)                   | 4816                  | 4132.4                | 0.318    |
| 99404761   | 14.09           | 9 (0.13%)                     | 4385                  | 4399.4                | -0.006   |
| 99404762   | 3.99            | 283 (4.21%)                   | 4729                  | 4226.3                | 0.231    |
| 99404763   | 4.11            | 659 (9.80%)                   | 4385                  | 3975.2                | 0.200    |
| 99404764   | 19.72           | 0 (0.00%)                     | 4363                  | 4405.9                | -0.019   |
| 99404765   | 7.36            | 155 (2.30%)                   | 4821                  | 4304.3                | 0.232    |
| 99404799   | 17.45           | 1 (0.01%)                     | 4387                  | 4405.4                | -0.008   |
| CROW-6     | 11.96           | 1 (0.01%)                     | 4167                  | 4404.9                | -0.104   |
| CROW-7     | 10.46           | 19 (0.28%)                    | 4308                  | 4393.1                | -0.037   |
| CROW-8     | 7.00            | 106 (1.57%)                   | 4567                  | 4336.3                | 0.103    |
| CROW-9     | 14.46           | 0 (0.00%)                     | 3589                  | 4405.9                | -0.359   |
| CROW-21    | 15.00           | 1 (0.01%)                     | 4218                  | 4405.2                | -0.082   |
| CROW-24    | 18.73           | 0 (0.00%)                     | 4463                  | 4405.9                | 0.025    |

**All samples - 50% data ellipse**

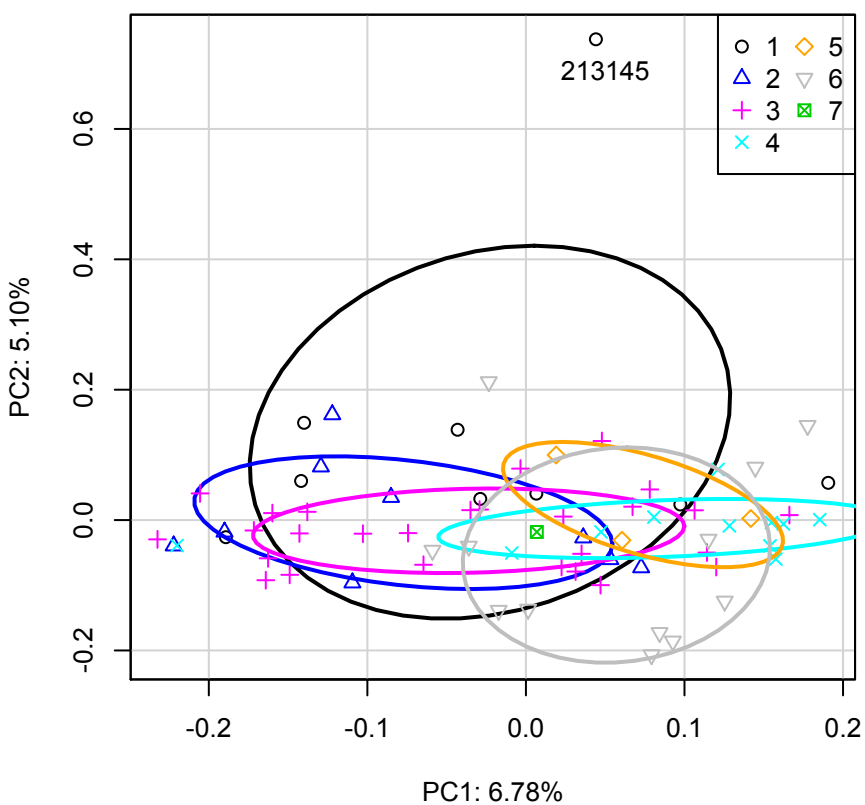

**All samples - 95% data ellipse**

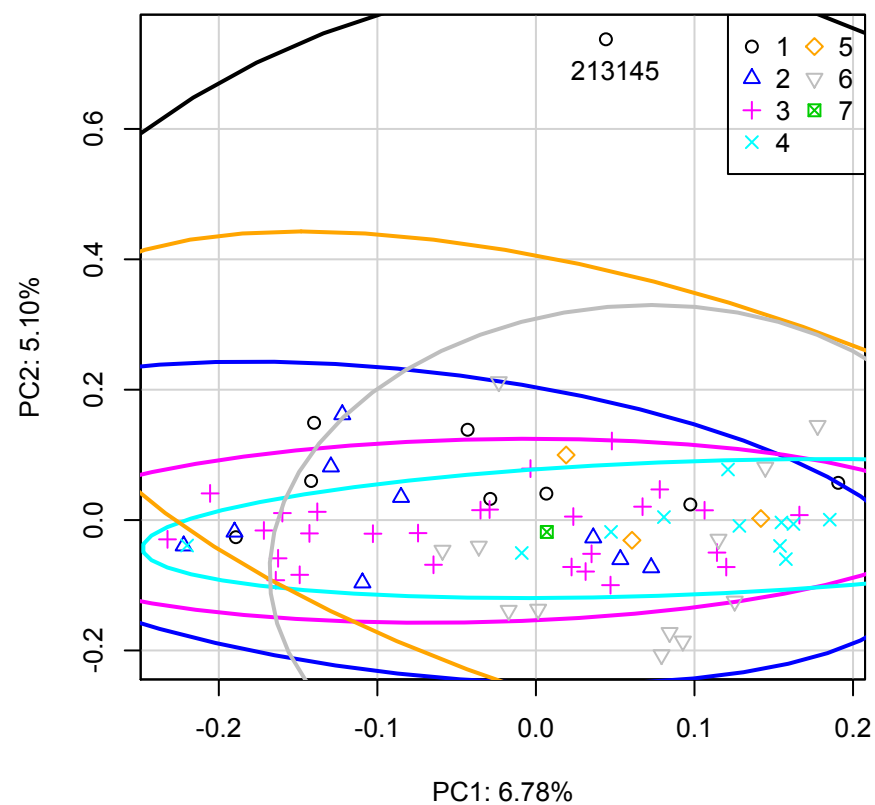

**84477245 and 99404745 excluded - 50% data ellipse**

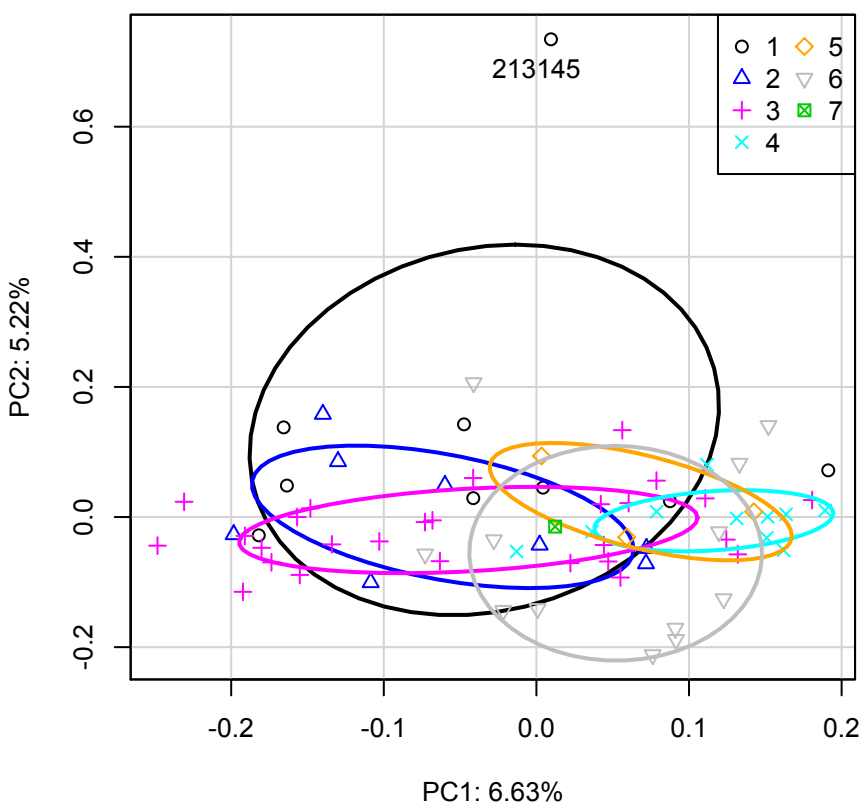

**84477245 and 99404745 excluded - 95% data ellipse**

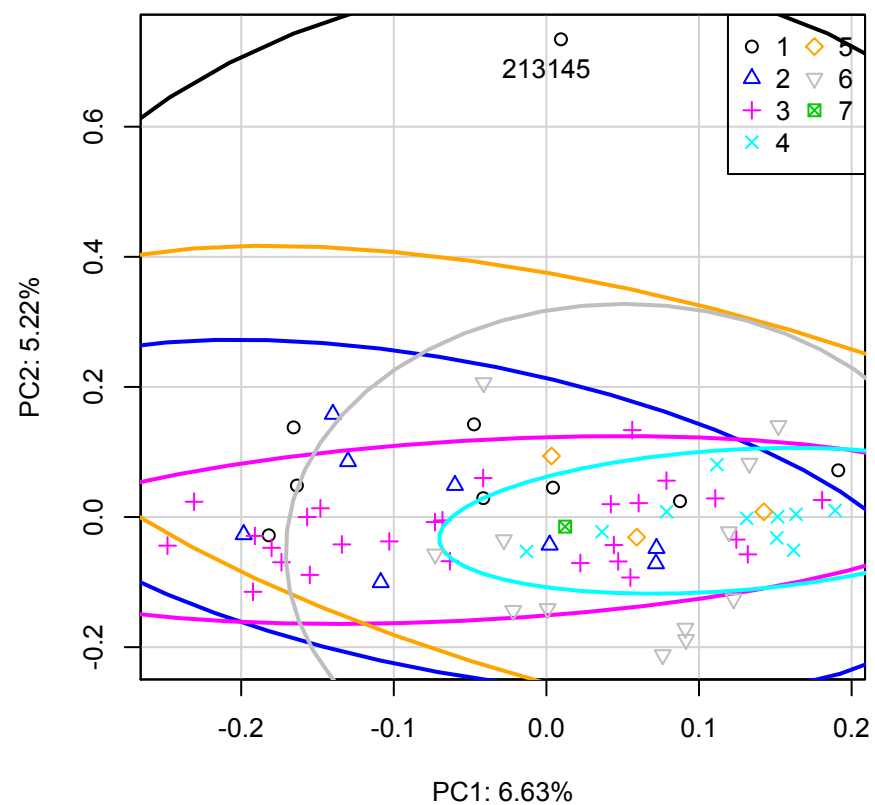

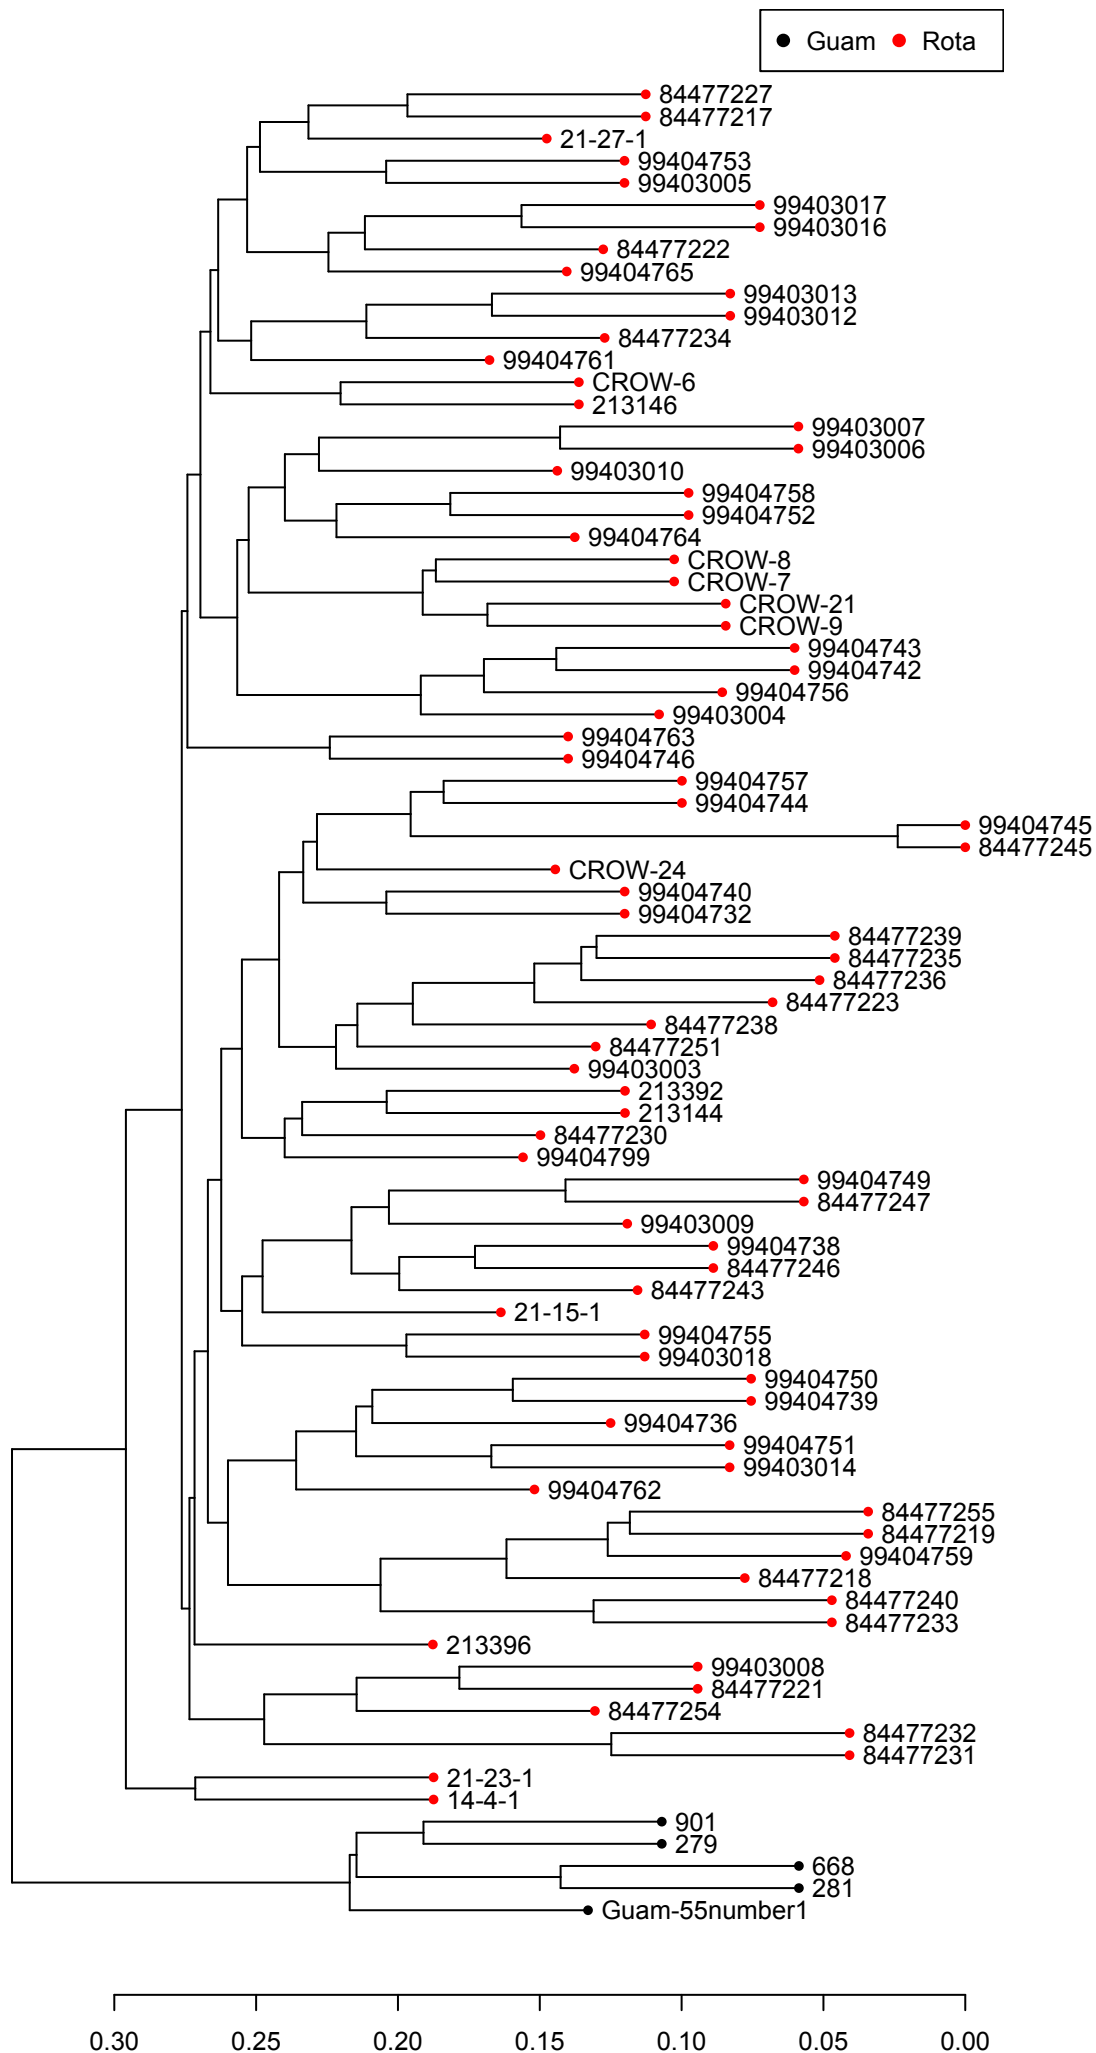

## Inter-island structure

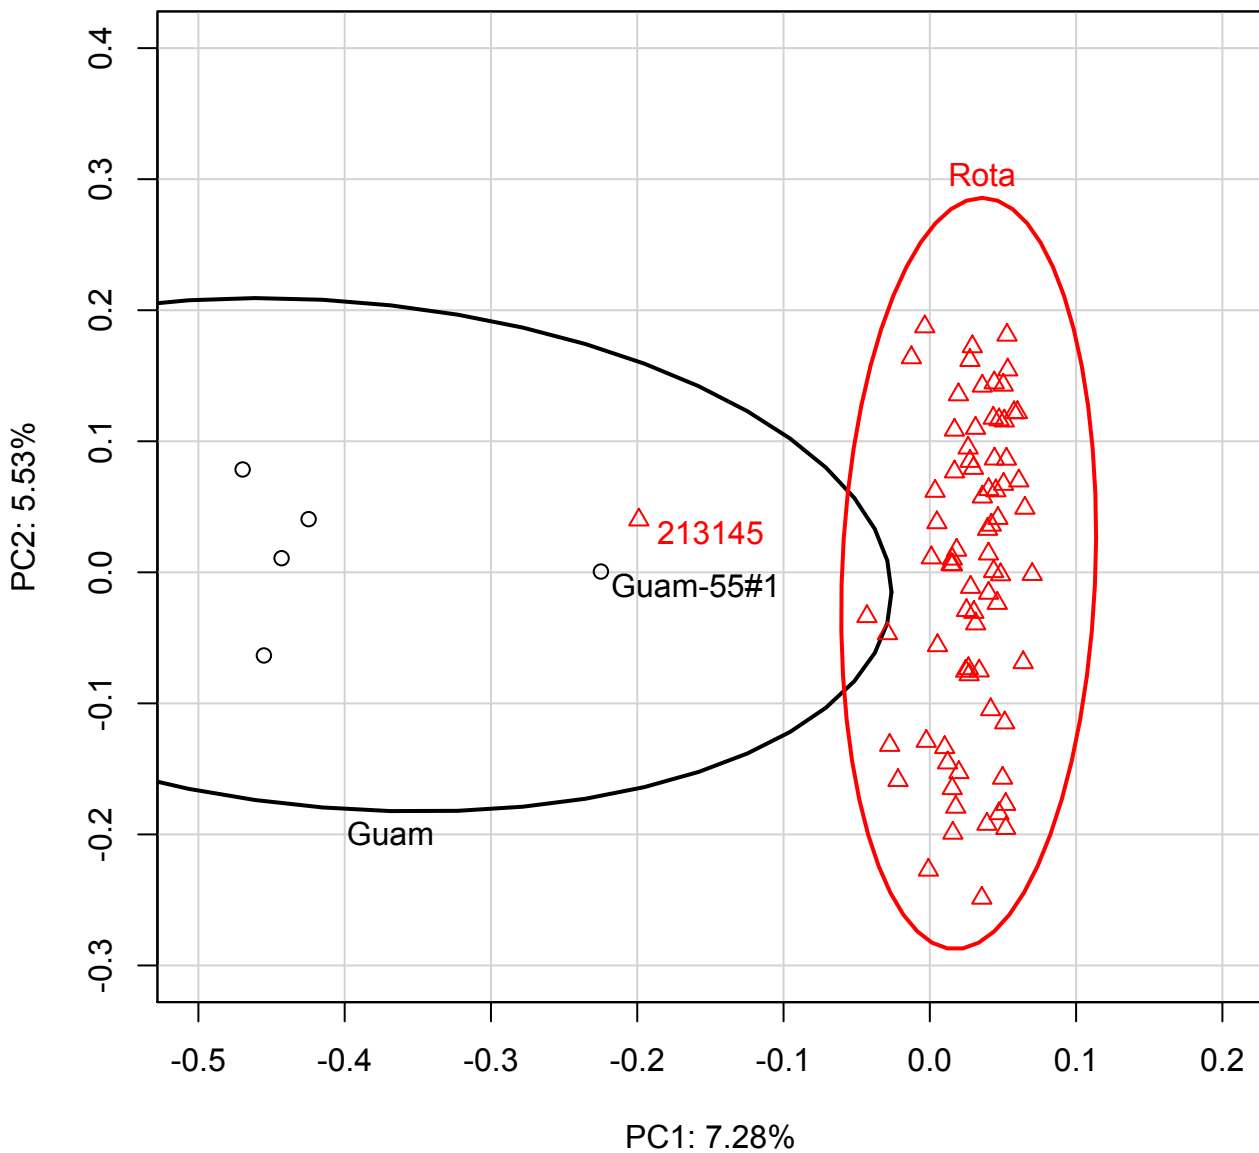

Structure ( $K = 3$ )

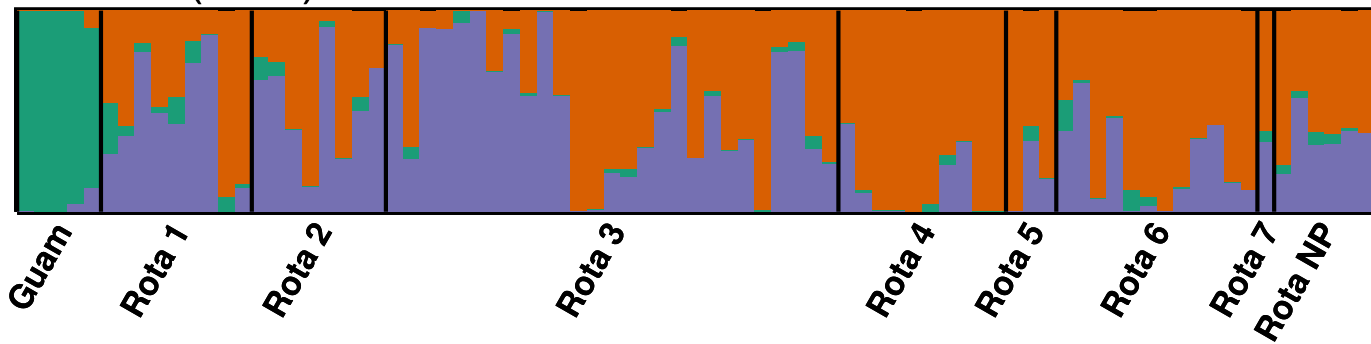

DAPC ( $K = 3$ )

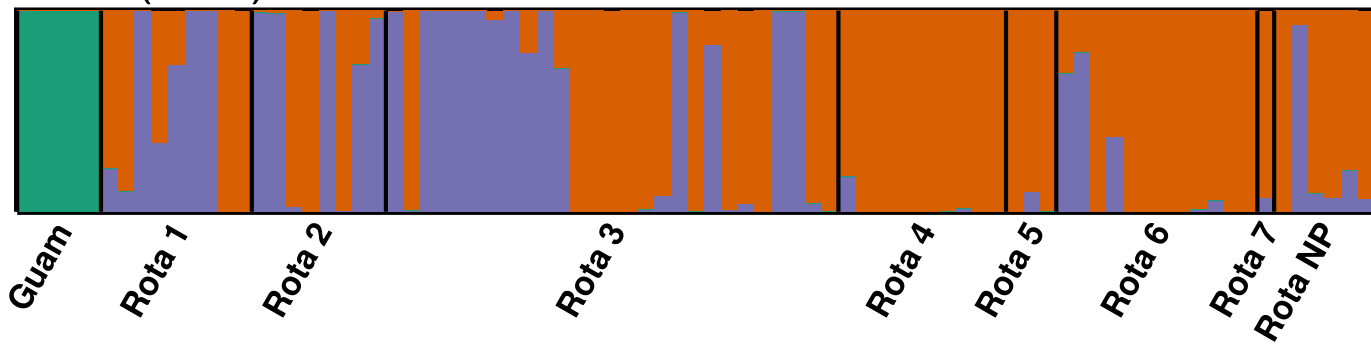

ADMIXTURE ( $K = 3$ )

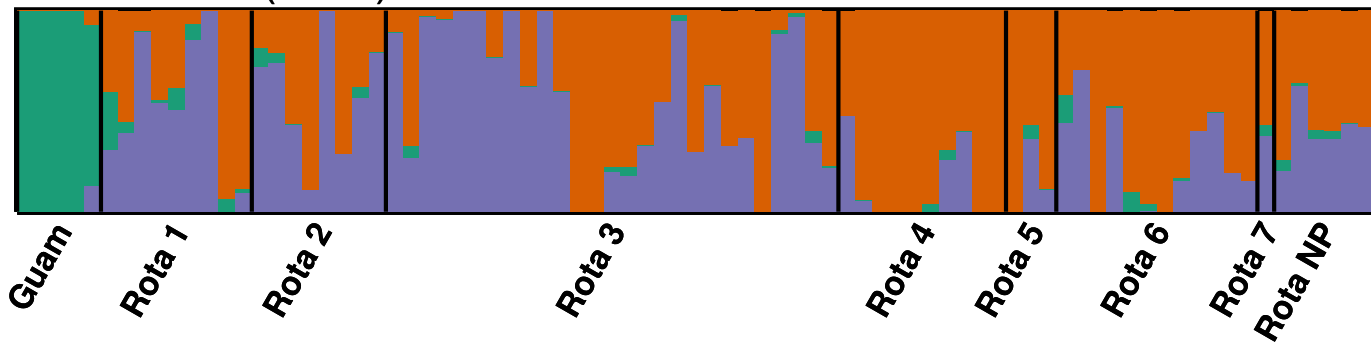

ADMIXTURE ( $K = 5$ )

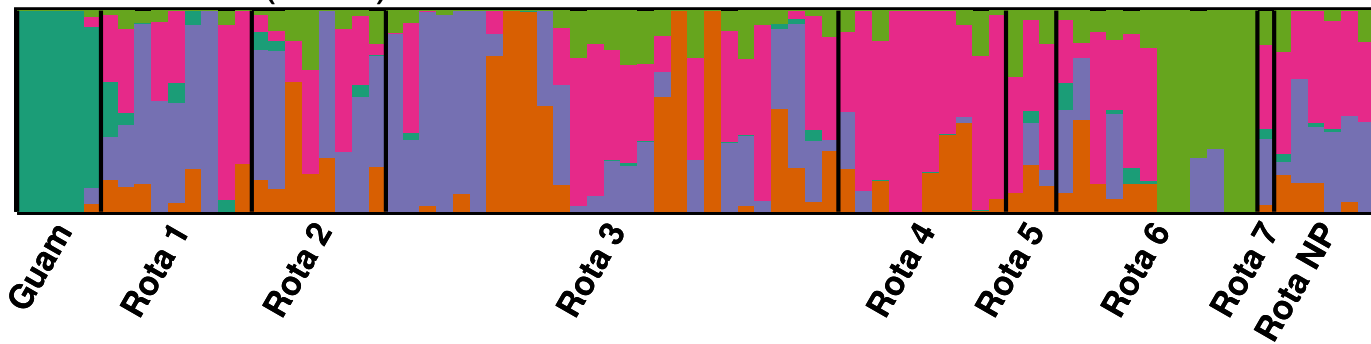

Supplement: s1 [file s1]
